# Supplementary material for: Source Identification and Risk Assessment of PAC Contamination in Typical Coal Mining Soils of Huaibei, China: Application of PMF and APCS-MLR Receptor Models
Source: Research Square preprint supplement (doi:10.21203/rs.3.rs-7533909/v1), 2025-09-16
Supplement: Supplementary file 1 [file 2fcb0c55d726f9efdf7ade9d.docx]

Table S1 Exposure parameters of health risks for PAHs.

| **Symbol** | **Parameter** | **Unit** | **Children** | **Adults** | **Child(Monte-Carlo)** | **Adult((Monte-Carlo))** | **Distribution** | **Reference** |
| --- | --- | --- | --- | --- | --- | --- | --- | --- |
| **IRIng** | Ingestion rate | mg/d | 200 | 100 | (12.24, 1.90) | (26.95, 1.88) | LN | USEPA, 1996 |
| **IRInh** | Inhalation rate | m3/d | 10.9 | 17.5 | (14.10, 1.72) | (32.73, 1.14) | LN | ICRP, 1994 |
| **EF** | Exposure frequency | d/a | 180 | 180 | (252, 1.01) | (252, 1.01) | LN | Yang et al., 2014 |
| **ED** | Exposure duration | a | 6 | 30 | (0, 5) | (0, 50) | U | Yang et al., 2014 |
| **CF** | Conversion factor | kg/mg | 1×10-6 | 1×10-6 | 1×10-6 | 1×10-6 | — | — |
| **SA** | Exposed skin surface area | cm2/d | 2800 | 5700 | (5838, 920) | (19771, 3373) | LN | Wu et al., 2011 |
| **AF** | Adherence factor | mg/cm2·day | 0.7 | 0.07 | 0.7 | 0.07 | — | USEPA, 2001 |
| **ABS** | Dermal adsorption factor | / | 0.13 | 0.13 | 0.13 | 0.13 | — | USEPA, 2001 |
| **BW** | Body weight | kg | 19.2 | 61.8 | (42.66,17.24) | (77.45,13.60) | LN | Chen et al., 2012 |
| **AT** | Average life expectancy | d | 25550 | 25550 | 25550 | 25550 | Point | Yang et al., 2014 |
| **PEF** | Particle emission factor | m3/kg | 1.36×109 | 1.36×109 | 1.36 × 109 | 1.36 × 109 | — | Yang et al., 2014 |

Note: (1) LN means for lognormal distribution (mean, standard deviation);

(2) U means uniform distribution (minimum, maximum).

**References**

Chen H.Y., Teng Y.G., Wang J.S., 2012. Source apportionment of polycyclic aromatic hydrocarbons (PAHs) in surface sediments of the Rizhao coastal area (China) using diagnostic ratios and factor analysis with nonnegative constraints. Sci. Total Environ. 414, 293-300.

ICRP, 1994. Human Respiratory Tract Model for Radiological Protection. ICRP Publication, Elsevier, New York, NY.

SEPAC (State Environmental Protection Agency of China), 2004. The Technical Specification for Soil Environmental Monitoring (HJ/T 166-2004). Beijing, China.

USEPA, 1996. Air quality criteria for particulate matter. EPA/600/P-95/001aF-cf. National Center for Environment Assessment RTP Office, Research Triangle Park, NC.

USEPA, 2001. Risk assessment guidance for superfund, volume 1: Human health evaluation manual (Part E, supplemental guidance for dermal risk assessment). EPA/540/R/99/005. Washington DC, USA E: Office of Emergency and Remedial Response.

Yang W., Lang Y., Li G., 2014. Cancer risk of polycyclic aromatic hydrocarbons (PAHs) in the soils from Jiaozhou Bay wetland. Chemosphere 112, 289-295.

Yang J., Yang Y., Liu M., Meng X.Z., Huang Y.P., Zhang X., Ma F.Q., 2019. Comparing and modeling sedimentary profiles of elemental carbon and polycyclic aromatic hydrocarbons between early-and newly urbanized areas in Shanghai. Environ. Pollu. 244, 971-979.

Wu B., Zhang Y., Zhang X.X., Cheng S.P., 2011. Health risk assessment of polycyclic aromatic hydrocarbons in the source water and drinking water of China: quantitative analysis based on published monitoring data. Sci. Total Environ 410-411, 112-118.

Table S2 Reference doses and carcinogenic slope factors for different exposure pathways of PACs.

| PACs | SF | | | RfD | | |
| --- | --- | --- | --- | --- | --- | --- |
| Inhalation | Ingestion | Dermal | Inhalation | Ingestion | Dermal |
| Nap | / | / | / | 8.57E-04 | 2.00E-02 | 2.00E-02 |
| Acy | / | / | / | 3.00E-02 | 6.00E-02 | 3.00E-02 |
| Ace | / | / | / | 3.00E-02 | 6.00E-02 | 3.00E-02 |
| Flu | / | / | / | 2.00E-02 | 4.00E-02 | 2.00E-02 |
| Phe | / | / | / | 1.50E-02 | 3.00E-02 | 1.50E-02 |
| Ant | / | / | / | 1.50E-01 | 3.00E-01 | 1.50E-01 |
| Fla | / | / | / | 2.00E-02 | 4.00E-02 | 2.00E-02 |
| Pyr | / | / | / | 1.50E-02 | 3.00E-02 | 1.50E-02 |
| BaA | 1.10E-04 | 7.30E-01 | 1.46E-02 | / | / | / |
| Chry | 1.10E-05 | 7.30E-03 | 1.46E+00 | / | / | / |
| BbF | 1.10E-04 | 7.30E-01 | 1.46E+00 | / | / | / |
| BkF | 1.10E-04 | 7.30E-02 | 1.46E-01 | / | / | / |
| BaP | 1.10E-03 | 7.30E-01 | 1.46E-01 | / | / | / |
| InP | 1.10E-04 | 7.30E-01 | 1.46E+00 | / | / | / |
| DaA | 1.20E-03 | 7.30E+00 | 1.46E-01 | / | / | / |
| BgP | / | / | / | 1.50E-02 | 3.00E-02 | 1.50E-02 |

Note: Parameters related to aPAHs and OPAHs refer to parent PAHs

Table S3 Concentration of PACs in soil near Liuqiao Mine (ng/g)

| PACs | Min | Max | Mean | Mdn |
| --- | --- | --- | --- | --- |
| NAP | 19.8 | 484.7 | 63.7 | 32.6 |
| ACY | 0 | 49.2 | 4 | 2.2 |
| ACE | 1.5 | 31.8 | 5.3 | 2.8 |
| FLU | 0 | 191.4 | 14.4 | 0 |
| PHE | 9.7 | 1067.1 | 121.2 | 30.7 |
| ANT | 0 | 86.3 | 4.1 | 0 |
| FLA | 9.4 | 780.8 | 75.9 | 25.3 |
| PYR | 16.6 | 525.9 | 67.3 | 34.7 |
| BaA | 1.6 | 318.1 | 42 | 15 |
| CHR | 1.6 | 794.8 | 91.8 | 26.9 |
| BbF | 0 | 327.1 | 36.9 | 11.2 |
| BkF | 0 | 293.3 | 32.1 | 11.1 |
| BaP | 0 | 222.7 | 24.8 | 10.6 |
| InP | 0 | 96.7 | 7.2 | 0 |
| DBA | 0 | 133.9 | 20.9 | 15.4 |
| BgP | 0 | 201 | 20.8 | 2.9 |
| **Σ7PAHs** | 3.2 | 2186.3 | 255.6 | 87.7 |
| **Σ16PAHs** | 67.6 | 5022.1 | 632.3 | 221.2 |
| C1-NAP | 8.1 | 419.5 | 45.8 | 23.1 |
| C2-NAP | 8.8 | 978.6 | 110.7 | 59.1 |
| C3-NAP | 1.6 | 444.4 | 46.7 | 20.9 |
| C4-NAP | 0 | 141.7 | 17.9 | 7.1 |
| C5-NAP | 0 | 8 | 0.5 | 0 |
| C1-ACE | 0 | 11.3 | 1.1 | 0 |
| C1-PHE | 0 | 1576.7 | 163.8 | 41.1 |
| C2-PHE | 0 | 184.8 | 13.2 | 0 |
| C3-PHE | 0 | 77.9 | 6.9 | 0 |
| C4-PHE | 0 | 30.2 | 2.4 | 0 |
| 2M-ANT | 0 | 30 | 0.8 | 0 |
| C1-FLU | 12.7 | 896 | 118.1 | 77.2 |
| C2-FLU | 0 | 436 | 28.1 | 4.4 |
| C1-FLA | 0 | 87.8 | 8.5 | 0 |
| C1-PYR | 0.2 | 274.5 | 27.8 | 4.3 |
| C1-CHR | 3.9 | 1129.7 | 110.8 | 17.4 |
| 7M-BaP | 0 | 92.7 | 9.4 | 0 |
| **ΣaPAHs** | 70.1 | 6603.8 | 712.7 | 251.3 |
| 9-FLUO | 0 | 181.9 | 14 | 3.1 |
| DBF | 4.3 | 359.7 | 37.5 | 14.8 |
| C1-DBF | 0 | 513.2 | 41.7 | 3.4 |
| C2-DBF | 0 | 46.1 | 4.3 | 0 |
| **ΣOPAHs** | 4.3 | 1030.1 | 97.5 | 22.3 |
| **ΣPACs** | 142 | 11422.3 | 1442.4 | 484 |

Note: 7PAHs refers to 7 highly carcinogenic PAHs, namely BaA, CHR, BbF, BkF, BaP, InP and DBA.

Table S4 Based on PMF model regression results

| PACs | factor1 | factor2 | factor3 | factor4 | R2 |
| --- | --- | --- | --- | --- | --- |
| NAP | 0 | 12.30% | 36.90% | 50.80% | 0.90675 |
| ACY | 3.40% | 56.90% | 24.40% | 15.30% | 0.92404 |
| ACE | 7.50% | 26.90% | 13.80% | 51.80% | 0.95513 |
| FLU | 83.50% | 3.50% | 8.80% | 4.20% | 0.81383 |
| PHE | 39.00% | 17.90% | 21.60% | 21.40% | 0.92061 |
| ANT | 27.70% | 72.30% | 0 | 0 | 0.90860 |
| FLA | 14.50% | 56.40% | 2% | 27.10% | 0.98466 |
| PYR | 6% | 51.80% | 0 | 42.20% | 0.97505 |
| BaA | 32.90% | 32.20% | 18.40% | 16.50% | 0.96588 |
| CHR | 38.20% | 37.50% | 11.40% | 12.80% | 0.97515 |
| BbF | 21.10% | 53.40% | 14.70% | 10.80% | 0.96364 |
| BkF | 21.10% | 59.10% | 10.10% | 9.70% | 0.95170 |
| BaP | 14.30% | 67.60% | 7.80% | 10.30% | 0.98358 |
| InP | 87.40% | 5.70% | 0 | 6.90% | 0.85224 |
| DBA | 88% | 0.70% | 5.80% | 5.50% | 0.82962 |
| BgP | 70.80% | 16.10% | 4.50% | 8.70% | 0.93733 |
| C1-NAP | 7.70% | 9% | 43.10% | 40.20% | 0.88792 |
| C2-NAP | 14.90% | 7.10% | 44.80% | 33.20% | 0.93373 |
| C3-NAP | 25.80% | 2.90% | 51.90% | 19.40% | 0.96834 |
| C4-NAP | 26.80% | 0 | 61.60% | 11.60% | 0.85301 |
| C5-NAP | 41.20% | 58.80% | 0 | 0 | 0.63023 |
| C1-ACE | 44.20% | 10.30% | 45.50% | 0 | 0.97099 |
| C1-PHE | 35.40% | 16.40% | 36.70% | 11.40% | 0.92192 |
| C2-PHE | 86.50% | 1.10% | 7.50% | 4.90% | 0.92838 |
| C3-PHE | 87.40% | 0.90% | 6.30% | 5.40% | 0.87470 |
| C4-PHE | 22.10% | 71.90% | 6.10% | 0 | 0.73464 |
| 2M-ANT | 5.40% | 94.60% | 0 | 0 | 0.60510 |
| C1-FLU | 14.80% | 0 | 18.60% | 66.60% | 0.93319 |
| C2-FLU | 82.00% | 1.20% | 12.70% | 4.10% | 0.73616 |
| C1-FLA | 77.60% | 6.40% | 12.70% | 3.20% | 0.88272 |
| C1-PYR | 67.20% | 17% | 6.50% | 9.30% | 0.93168 |
| C1-CHR | 61% | 10.70% | 14.70% | 13.60% | 0.91473 |
| 7M-BaP | 14.20% | 41.70% | 44.10% | 0 | 0.86124 |
| 9-FLUO | 38.60% | 10.80% | 44% | 6.70% | 0.87818 |
| DBF | 21.70% | 12.30% | 33.30% | 33.60% | 0.96350 |
| C1-DBF | 76.20% | 1.70% | 16.40% | 5.80% | 0.91381 |
| C2-DBF | 79% | 0.20% | 18.50% | 2.30% | 0.89455 |
| Average contribution | 35.68% | 28.12% | 24.26% | 11.94% | / |

Table S5 Component loadings for parameters after varimax rotation

| PACs | factor 1 | factor 2 |
| --- | --- | --- |
| NAP | 0.957 | 0.168 |
| ACY | 0.346 | 0.875 |
| ACE | 0.733 | 0.647 |
| FLU | 0.918 | 0.351 |
| PHE | 0.838 | 0.493 |
| ANT | 0.133 | 0.958 |
| FLA | 0.315 | 0.941 |
| PYR | 0.344 | 0.932 |
| BaA | 0.656 | 0.734 |
| CHR | 0.61 | 0.769 |
| BbF | 0.518 | 0.837 |
| BkF | 0.559 | 0.809 |
| BaP | 0.372 | 0.914 |
| InP | 0.386 | 0.9 |
| DBA | 0.694 | 0.591 |
| BgP | 0.568 | 0.794 |
| C1-NAP | 0.961 | 0.164 |
| C2-NAP | 0.941 | 0.27 |
| C3-NAP | 0.894 | 0.404 |
| C4-NAP | 0.786 | 0.564 |
| C5-NAP | 0.626 | 0.644 |
| C1-ACE | 0.792 | 0.589 |
| C1-PHE | 0.87 | 0.463 |
| C2-PHE | 0.821 | 0.536 |
| C3-PHE | 0.683 | 0.642 |
| C4-PHE | 0.417 | 0.804 |
| 2M-ANT | -0.057 | 0.879 |
| C1-FLU | 0.948 | 0.13 |
| C2-FLU | 0.947 | 0.238 |
| C1-FLA | 0.547 | 0.806 |
| C1-PYR | 0.544 | 0.817 |
| C1-CHR | 0.842 | 0.491 |
| 7M-BaP | 0.7 | 0.612 |
| 9-FLUO | 0.695 | 0.616 |
| DBF | 0.866 | 0.438 |
| C1-DBF | 0.824 | 0.513 |
| C2-DBF | 0.664 | 0.693 |
| variance contribution | 48.90% | 44.21% |

Table S6 Regression results based on the APCS-MLR model

| PACs | factor 1 | factor 2 | unknown factor | R2 |
| --- | --- | --- | --- | --- |
| NAP | 66.10% | 5.67% | 28.23% | 0.942 |
| ACY | 57.24% | 27.99% | 14.77% | 0.883 |
| ACE | 48.71% | 21.02% | 30.27% | 0.954 |
| FLU | 67.21% | 12.58% | 20.21% | 0.966 |
| PHE | 72.11% | 20.74% | 7.15% | 0.943 |
| ANT | 18.44% | 64.83% | 16.73% | 0.934 |
| FLA | 33.07% | 48.25% | 18.68% | 0.984 |
| PYR | 25.63% | 34.01% | 40.36% | 0.986 |
| BaA | 58.40% | 31.93% | 9.68% | 0.968 |
| CHR | 58.01% | 35.76% | 6.23% | 0.962 |
| BbF | 51.34% | 40.59% | 8.08% | 0.969 |
| BkF | 53.98% | 38.17% | 7.86% | 0.966 |
| BaP | 34.51% | 41.43% | 24.07% | 0.972 |
| InP | 40.86% | 46.52% | 12.62% | 0.957 |
| DBA | 55.71% | 23.21% | 21.08% | 0.824 |
| BgP | 58.71% | 40.16% | 1.14% | 0.952 |
| C1-NAP | 76.81% | 6.40% | 16.80% | 0.949 |
| C2-NAP | 72.46% | 10.17% | 17.38% | 0.957 |
| C3-NAP | 76.26% | 16.86% | 6.88% | 0.961 |
| C4-NAP | 65.26% | 22.89% | 11.85% | 0.934 |
| C5-NAP | 47.28% | 23.80% | 28.92% | 0.800 |
| C1-ACE | 62.84% | 22.87% | 14.29% | 0.973 |
| C1-PHE | 72.53% | 18.88% | 8.59% | 0.971 |
| C2-PHE | 55.50% | 17.72% | 26.78% | 0.960 |
| C3-PHE | 53.06% | 24.38% | 22.56% | 0.875 |
| C4-PHE | 43.81% | 41.31% | 14.88% | 0.815 |
| 2M-ANT | 11.37% | 85.34% | 3.28% | 0.767 |
| C1-FLU | 57.88% | 3.87% | 38.24% | 0.913 |
| C2-FLU | 70.98% | 8.72% | 20.30% | 0.951 |
| C1-FLA | 57.11% | 41.12% | 1.77% | 0.947 |
| C1-PYR | 57.30% | 42.12% | 0.57% | 0.962 |
| C1-CHR | 63.81% | 18.20% | 17.98% | 0.949 |
| 7M-BaP | 58.39% | 24.94% | 16.67% | 0.860 |
| 9-FLUO | 62.19% | 26.95% | 10.86% | 0.858 |
| DBF | 76.41% | 18.91% | 4.68% | 0.940 |
| C1-DBF | 61.78% | 18.80% | 19.41% | 0.940 |
| C2-DBF | 54.29% | 27.71% | 18.01% | 0.918 |
| Average contribution | 55.60% | 28.51% | 15.89% | / |

Table S7 Non-carcinogenic and carcinogenic health risk sbased on the HHR

| PACs | Children | | | | Adult | | | |
| --- | --- | --- | --- | --- | --- | --- | --- | --- |
| HQInh | HQIng | HQDer | NCR | HQInh | HQIng | HQDer | NCR |
| NAP | 1.31E-06 | 1.40E-03 | 1.79E-03 | 3.19E-03 | 3.27E-06 | 1.09E-03 | 5.65E-04 | 1.66E-03 |
| ACY | 2.35E-09 | 2.94E-05 | 7.49E-05 | 1.04E-04 | 5.72E-09 | 2.28E-05 | 2.37E-05 | 4.65E-05 |
| ACE | 3.12E-09 | 3.90E-05 | 9.93E-05 | 1.38E-04 | 7.32E-09 | 3.03E-05 | 3.14E-05 | 6.17E-05 |
| FLU | 1.27E-08 | 1.58E-04 | 4.04E-04 | 5.62E-04 | 7.06E-09 | 1.23E-04 | 1.28E-04 | 2.51E-04 |
| PHE | 1.42E-07 | 1.78E-03 | 4.53E-03 | 6.30E-03 | 2.18E-07 | 1.38E-03 | 1.43E-03 | 2.81E-03 |
| ANT | 4.78E-10 | 5.97E-06 | 1.52E-05 | 2.12E-05 | 9.44E-10 | 4.64E-06 | 4.81E-06 | 9.45E-06 |
| FLA | 6.69E-08 | 8.35E-04 | 2.13E-03 | 2.96E-03 | 1.43E-07 | 6.49E-04 | 6.73E-04 | 1.32E-03 |
| PYR | 7.92E-08 | 9.88E-04 | 2.52E-03 | 3.51E-03 | 1.86E-07 | 7.67E-04 | 7.96E-04 | 1.56E-03 |
| BgP | 2.45E-08 | 3.06E-04 | 7.80E-04 | 1.09E-03 | 2.00E-08 | 2.38E-04 | 2.47E-04 | 4.84E-04 |
| C1-NAP | 9.43E-07 | 1.01E-03 | 1.29E-03 | 2.29E-03 | 2.18E-06 | 7.83E-04 | 4.06E-04 | 1.19E-03 |
| C2-NAP | 2.28E-06 | 2.44E-03 | 3.11E-03 | 5.54E-03 | 4.85E-06 | 1.89E-03 | 9.82E-04 | 2.88E-03 |
| C3-NAP | 9.62E-07 | 1.03E-03 | 1.31E-03 | 2.34E-03 | 1.79E-06 | 7.99E-04 | 4.15E-04 | 1.22E-03 |
| C4-NAP | 3.69E-07 | 3.95E-04 | 5.03E-04 | 8.98E-04 | 6.88E-07 | 3.07E-04 | 1.59E-04 | 4.66E-04 |
| C5-NAP | 1.03E-08 | 1.10E-05 | 1.41E-05 | 2.51E-05 | 3.63E-08 | 8.58E-06 | 4.45E-06 | 1.31E-05 |
| C1-ACE | 6.50E-10 | 8.11E-06 | 2.07E-05 | 2.88E-05 | 1.55E-09 | 6.30E-06 | 6.53E-06 | 1.28E-05 |
| C1-PHE | 1.93E-07 | 2.40E-03 | 6.12E-03 | 8.52E-03 | 3.11E-07 | 1.87E-03 | 1.94E-03 | 3.80E-03 |
| C2-PHE | 1.56E-08 | 1.94E-04 | 4.95E-04 | 6.90E-04 | 7.78E-09 | 1.51E-04 | 1.57E-04 | 3.08E-04 |
| C3-PHE | 8.15E-09 | 1.02E-04 | 2.59E-04 | 3.61E-04 | 5.12E-09 | 7.90E-05 | 8.19E-05 | 1.61E-04 |
| C4-PHE | 2.82E-09 | 3.52E-05 | 8.98E-05 | 1.25E-04 | 6.14E-09 | 2.74E-05 | 2.84E-05 | 5.58E-05 |
| 2M-ANT | 8.86E-11 | 1.11E-06 | 2.82E-06 | 3.92E-06 | 2.25E-10 | 8.59E-07 | 8.91E-07 | 1.75E-06 |
| C1-FLU | 1.04E-07 | 1.30E-03 | 3.31E-03 | 4.61E-03 | 2.22E-07 | 1.01E-03 | 1.05E-03 | 2.06E-03 |
| C2-FLU | 2.48E-08 | 3.09E-04 | 7.88E-04 | 1.10E-03 | 1.29E-08 | 2.40E-04 | 2.49E-04 | 4.89E-04 |
| C1-FLA | 7.53E-09 | 9.39E-05 | 2.39E-04 | 3.33E-04 | 5.90E-09 | 7.29E-05 | 7.57E-05 | 1.49E-04 |
| C1-PYR | 3.27E-08 | 4.08E-04 | 1.04E-03 | 1.45E-03 | 2.87E-08 | 3.17E-04 | 3.29E-04 | 6.46E-04 |
| 9-FLUO | 1.24E-08 | 1.54E-04 | 3.93E-04 | 5.48E-04 | 1.98E-08 | 1.20E-04 | 1.24E-04 | 2.44E-04 |
| total | 6.61E-06 | 1.54E-02 | 3.13E-02 | 4.67E-02 | 1.40E-05 | 1.20E-02 | 9.90E-03 | 2.19E-02 |
|  | CRInh | CRIng | CRDer | CR | CRInh | CRIng | CRDer | CR |
| BaA | 8.15E-14 | 1.35E-05 | 3.44E-07 | 1.38E-05 | 2.03E-13 | 1.05E-05 | 1.09E-07 | 1.06E-05 |
| CHR | 1.78E-14 | 2.95E-07 | 7.51E-05 | 7.54E-05 | 4.44E-14 | 2.29E-07 | 2.37E-05 | 2.40E-05 |
| BbF | 7.16E-14 | 1.19E-05 | 3.02E-05 | 4.21E-05 | 1.78E-13 | 9.21E-06 | 9.55E-06 | 1.88E-05 |
| BkF | 6.23E-14 | 1.03E-06 | 2.63E-06 | 3.66E-06 | 1.55E-13 | 8.02E-07 | 8.32E-07 | 1.63E-06 |
| BaP | 4.81E-13 | 7.97E-06 | 2.03E-06 | 1.00E-05 | 1.20E-12 | 6.19E-06 | 6.42E-07 | 6.83E-06 |
| InP | 1.39E-14 | 2.31E-06 | 5.88E-06 | 8.19E-06 | 3.48E-14 | 1.79E-06 | 1.86E-06 | 3.65E-06 |
| DBA | 4.42E-13 | 6.71E-05 | 1.71E-06 | 6.88E-05 | 1.10E-12 | 5.21E-05 | 5.40E-07 | 5.26E-05 |
| C1-CHR | 2.15E-14 | 3.56E-07 | 9.07E-05 | 9.11E-05 | 5.36E-14 | 2.77E-07 | 2.87E-05 | 2.90E-05 |
| 7M-BaP | 1.83E-13 | 3.02E-06 | 7.71E-07 | 3.79E-06 | 4.55E-13 | 2.35E-06 | 2.44E-07 | 2.59E-06 |
| DBF | 7.35E-15 | 1.22E-07 | 3.10E-07 | 4.32E-07 | 1.83E-14 | 9.45E-08 | 9.81E-08 | 1.93E-07 |
| C1-DBF | 8.10E-15 | 1.34E-07 | 3.42E-07 | 4.76E-07 | 2.02E-14 | 1.04E-07 | 1.08E-07 | 2.12E-07 |
| C2-DBF | 8.29E-16 | 1.37E-08 | 3.50E-08 | 4.87E-08 | 2.07E-15 | 1.07E-08 | 1.11E-08 | 2.17E-08 |
| total | 1.39E-12 | 1.08E-04 | 2.10E-04 | 3.18E-04 | 3.47E-12 | 8.36E-05 | 6.64E-05 | 1.50E-04 |

Table S8 Summary statistics of non-carcinogenic and carcinogenic health risks based on Monte-Carlo and HHR.

| Model | Risk parameters | Children | Adults |
| --- | --- | --- | --- |
| HHR | NCR | 4.676E-02 | 2.191E-02 |
| CR | 3.200E-04 | 1.500E-04 |
| Monte-Carlo | NCR | 1.990E-02 | 3.610E-02 |
| CR | 1.340E-04 | 2.000E-04 |

Table S9 Source-oriented non-carcinogenic and carcinogenic health risks based on PMF and HHR

| Risk type | PACs | Factor 1 | | Factor 2 | | Factor 3 | | Factor 4 | |
| --- | --- | --- | --- | --- | --- | --- | --- | --- | --- |
| children | adult | children | adult | children | adult | children | adult |
| NCR | NAP | 0.00E+00 | 0.00E+00 | 3.92E-04 | 2.04E-04 | 1.18E-03 | 6.12E-04 | 1.62E-03 | 8.42E-04 |
| ACY | 3.54E-06 | 1.58E-06 | 5.93E-05 | 2.65E-05 | 2.54E-05 | 1.13E-05 | 1.59E-05 | 7.11E-06 |
| ACE | 1.04E-05 | 4.63E-06 | 3.72E-05 | 1.66E-05 | 1.91E-05 | 8.52E-06 | 7.17E-05 | 3.20E-05 |
| FLU | 4.69E-04 | 2.09E-04 | 1.97E-05 | 8.78E-06 | 4.95E-05 | 2.21E-05 | 2.36E-05 | 1.05E-05 |
| PHE | 2.46E-03 | 1.10E-03 | 1.13E-03 | 5.04E-04 | 1.36E-03 | 6.08E-04 | 1.35E-03 | 6.02E-04 |
| ANT | 5.87E-06 | 2.62E-06 | 1.53E-05 | 6.83E-06 | 0.00E+00 | 0.00E+00 | 0.00E+00 | 0.00E+00 |
| FLA | 4.30E-04 | 1.92E-04 | 1.67E-03 | 7.45E-04 | 5.93E-05 | 2.64E-05 | 8.03E-04 | 3.58E-04 |
| PYR | 2.10E-04 | 9.38E-05 | 1.82E-03 | 8.10E-04 | 0.00E+00 | 0.00E+00 | 1.48E-03 | 6.60E-04 |
| BgP | 7.68E-04 | 3.43E-04 | 1.75E-04 | 7.79E-05 | 4.88E-05 | 2.18E-05 | 9.44E-05 | 4.21E-05 |
| C1-NAP | 1.77E-04 | 9.16E-05 | 2.07E-04 | 1.07E-04 | 9.89E-04 | 5.14E-04 | 9.22E-04 | 4.79E-04 |
| C2-NAP | 8.26E-04 | 4.28E-04 | 3.94E-04 | 2.05E-04 | 2.48E-03 | 1.29E-03 | 1.84E-03 | 9.56E-04 |
| C3-NAP | 6.04E-04 | 3.13E-04 | 6.79E-05 | 3.53E-05 | 1.21E-03 | 6.31E-04 | 4.54E-04 | 2.36E-04 |
| C4-NAP | 2.41E-04 | 1.25E-04 | 0.00E+00 | 0.00E+00 | 5.53E-04 | 2.88E-04 | 1.04E-04 | 5.41E-05 |
| C5-NAP | 1.04E-05 | 5.39E-06 | 1.48E-05 | 7.67E-06 | 0.00E+00 | 0.00E+00 | 0.00E+00 | 0.00E+00 |
| C1-ACE | 1.27E-05 | 5.67E-06 | 2.96E-06 | 1.32E-06 | 1.31E-05 | 5.84E-06 | 0.00E+00 | 0.00E+00 |
| C1-PHE | 3.02E-03 | 1.35E-03 | 1.40E-03 | 6.24E-04 | 3.13E-03 | 1.40E-03 | 9.73E-04 | 4.34E-04 |
| C2-PHE | 5.97E-04 | 2.66E-04 | 7.59E-06 | 3.38E-06 | 5.17E-05 | 2.31E-05 | 3.38E-05 | 1.51E-05 |
| C3-PHE | 3.15E-04 | 1.41E-04 | 3.25E-06 | 1.45E-06 | 2.27E-05 | 1.01E-05 | 1.95E-05 | 8.69E-06 |
| C4-PHE | 2.76E-05 | 1.23E-05 | 8.98E-05 | 4.01E-05 | 7.62E-06 | 3.40E-06 | 0.00E+00 | 0.00E+00 |
| 2M-ANT | 2.12E-07 | 9.45E-08 | 3.71E-06 | 1.66E-06 | 0.00E+00 | 0.00E+00 | 0.00E+00 | 0.00E+00 |
| C1-FLU | 6.83E-04 | 3.05E-04 | 0.00E+00 | 0.00E+00 | 8.58E-04 | 3.83E-04 | 3.07E-03 | 1.37E-03 |
| C2-FLU | 9.00E-04 | 4.01E-04 | 1.32E-05 | 5.87E-06 | 1.39E-04 | 6.22E-05 | 4.50E-05 | 2.01E-05 |
| C1-FLA | 2.59E-04 | 1.15E-04 | 2.13E-05 | 9.52E-06 | 4.24E-05 | 1.89E-05 | 1.07E-05 | 4.76E-06 |
| C1-PYR | 9.74E-04 | 4.34E-04 | 2.46E-04 | 1.10E-04 | 9.42E-05 | 4.20E-05 | 1.35E-04 | 6.01E-05 |
| 9-FLUO | 2.11E-04 | 9.42E-05 | 5.91E-05 | 2.64E-05 | 2.41E-04 | 1.07E-04 | 3.67E-05 | 1.64E-05 |
| Total Risk | 1.32E-02 | 6.03E-03 | 7.84E-03 | 3.58E-03 | 1.26E-02 | 6.08E-03 | 1.31E-02 | 6.21E-03 |
| Source Proportion(%) | 28.27% | 27.53% | 16.78% | 16.34% | 26.92% | 27.78% | 28.03% | 28.35% |
| CR | BaA | 4.56E-06 | 3.49E-06 | 4.46E-06 | 3.41E-06 | 2.55E-06 | 1.95E-06 | 2.28E-06 | 1.75E-06 |
| CHR | 2.88E-05 | 9.17E-06 | 2.83E-05 | 9.00E-06 | 8.60E-06 | 2.74E-06 | 9.66E-06 | 3.07E-06 |
| BbF | 8.87E-06 | 3.96E-06 | 2.25E-05 | 1.00E-05 | 6.18E-06 | 2.76E-06 | 4.54E-06 | 2.03E-06 |
| BkF | 7.73E-07 | 3.45E-07 | 2.16E-06 | 9.65E-07 | 3.70E-07 | 1.65E-07 | 3.55E-07 | 1.58E-07 |
| BaP | 1.43E-06 | 9.77E-07 | 6.76E-06 | 4.62E-06 | 7.80E-07 | 5.33E-07 | 1.03E-06 | 7.03E-07 |
| InP | 7.16E-06 | 3.19E-06 | 4.67E-07 | 2.08E-07 | 0.00E+00 | 0.00E+00 | 5.65E-07 | 2.52E-07 |
| DBA | 6.05E-05 | 4.63E-05 | 4.81E-07 | 3.68E-07 | 3.99E-06 | 3.05E-06 | 3.78E-06 | 2.89E-06 |
| C1-CHR | 5.56E-05 | 1.77E-05 | 9.74E-06 | 3.10E-06 | 1.34E-05 | 4.26E-06 | 1.24E-05 | 3.94E-06 |
| 7M-BaP | 5.39E-07 | 3.68E-07 | 1.58E-06 | 1.08E-06 | 1.67E-06 | 1.14E-06 | 0.00E+00 | 0.00E+00 |
| DBF | 9.29E-08 | 4.14E-08 | 5.26E-08 | 2.35E-08 | 1.42E-07 | 6.36E-08 | 1.44E-07 | 6.41E-08 |
| C1-DBF | 3.62E-07 | 1.62E-07 | 8.08E-09 | 3.60E-09 | 7.80E-08 | 3.48E-08 | 2.76E-08 | 1.23E-08 |
| C2-DBF | 3.85E-08 | 1.72E-08 | 9.74E-11 | 4.34E-11 | 9.01E-09 | 4.02E-09 | 1.12E-09 | 5.00E-10 |
| Total Risk | 1.69E-04 | 8.57E-05 | 7.65E-05 | 3.28E-05 | 3.78E-05 | 1.67E-05 | 3.48E-05 | 1.49E-05 |
| Source Proportion(%) | 53.10% | 57.11% | 24.07% | 21.85% | 11.88% | 11.13% | 10.95% | 9.91% |

Table S10 Source-oriented non-carcinogenic and carcinogenic health risks based on APCS-MLR and HHR

| Risk type | PACs | Factor 1 | | Factor 2 | | Unknown factor | |
| --- | --- | --- | --- | --- | --- | --- | --- |
| children | adult | children | adult | children | adult |
| NCR | NAP | 2.11E-03 | 1.10E-03 | 1.81E-04 | 9.39E-05 | 9.01E-04 | 4.68E-04 |
| ACY | 5.97E-05 | 2.66E-05 | 2.92E-05 | 1.30E-05 | 1.54E-05 | 6.87E-06 |
| ACE | 6.74E-05 | 3.01E-05 | 2.91E-05 | 1.30E-05 | 4.19E-05 | 1.87E-05 |
| FLU | 3.78E-04 | 1.69E-04 | 7.07E-05 | 3.15E-05 | 1.14E-04 | 5.07E-05 |
| PHE | 4.55E-03 | 2.03E-03 | 1.31E-03 | 5.84E-04 | 4.51E-04 | 2.01E-04 |
| ANT | 3.91E-06 | 1.74E-06 | 1.37E-05 | 6.13E-06 | 3.54E-06 | 1.58E-06 |
| FLA | 9.80E-04 | 4.37E-04 | 1.43E-03 | 6.38E-04 | 5.54E-04 | 2.47E-04 |
| PYR | 8.98E-04 | 4.01E-04 | 1.19E-03 | 5.32E-04 | 1.41E-03 | 6.31E-04 |
| BgP | 6.37E-04 | 2.84E-04 | 4.36E-04 | 1.94E-04 | 1.23E-05 | 5.49E-06 |
| C1-NAP | 1.76E-03 | 9.16E-04 | 1.47E-04 | 7.62E-05 | 3.85E-04 | 2.00E-04 |
| C2-NAP | 4.02E-03 | 2.09E-03 | 5.64E-04 | 2.93E-04 | 9.64E-04 | 5.01E-04 |
| C3-NAP | 1.78E-03 | 9.27E-04 | 3.95E-04 | 2.05E-04 | 1.61E-04 | 8.36E-05 |
| C4-NAP | 5.86E-04 | 3.05E-04 | 2.06E-04 | 1.07E-04 | 1.06E-04 | 5.53E-05 |
| C5-NAP | 1.19E-05 | 6.17E-06 | 5.98E-06 | 3.11E-06 | 7.27E-06 | 3.77E-06 |
| C1-ACE | 1.81E-05 | 8.06E-06 | 6.58E-06 | 2.93E-06 | 4.11E-06 | 1.83E-06 |
| C1-PHE | 6.19E-03 | 2.76E-03 | 1.61E-03 | 7.18E-04 | 7.33E-04 | 3.27E-04 |
| C2-PHE | 3.83E-04 | 1.71E-04 | 1.22E-04 | 5.45E-05 | 1.85E-04 | 8.24E-05 |
| C3-PHE | 1.91E-04 | 8.54E-05 | 8.79E-05 | 3.92E-05 | 8.14E-05 | 3.63E-05 |
| C4-PHE | 5.47E-05 | 2.44E-05 | 5.16E-05 | 2.30E-05 | 1.86E-05 | 8.29E-06 |
| 2M-ANT | 4.46E-07 | 1.99E-07 | 3.35E-06 | 1.49E-06 | 1.29E-07 | 5.74E-08 |
| C1-FLU | 2.67E-03 | 1.19E-03 | 1.79E-04 | 7.97E-05 | 1.76E-03 | 7.87E-04 |
| C2-FLU | 7.79E-04 | 3.47E-04 | 9.57E-05 | 4.27E-05 | 2.23E-04 | 9.94E-05 |
| C1-FLA | 1.90E-04 | 8.49E-05 | 1.37E-04 | 6.12E-05 | 5.91E-06 | 2.64E-06 |
| C1-PYR | 8.30E-04 | 3.70E-04 | 6.10E-04 | 2.72E-04 | 8.33E-06 | 3.72E-06 |
| 9-FLUO | 3.40E-04 | 1.52E-04 | 1.48E-04 | 6.58E-05 | 5.94E-05 | 2.65E-05 |
| Total Risk | 2.95E-02 | 1.39E-02 | 9.06E-03 | 4.15E-03 | 8.21E-03 | 3.85E-03 |
| Source Proportion(%) | 63.07% | 63.49% | 19.37% | 18.94% | 17.56% | 17.57% |
| CR | BaA | 8.08E-06 | 6.19E-06 | 4.42E-06 | 3.38E-06 | 1.34E-06 | 1.03E-06 |
| CHR | 4.38E-05 | 1.39E-05 | 2.70E-05 | 8.58E-06 | 4.70E-06 | 1.49E-06 |
| BbF | 2.16E-05 | 9.63E-06 | 1.71E-05 | 7.61E-06 | 3.40E-06 | 1.51E-06 |
| BkF | 1.98E-06 | 8.82E-07 | 1.40E-06 | 6.23E-07 | 2.88E-07 | 1.28E-07 |
| BaP | 3.45E-06 | 2.36E-06 | 4.14E-06 | 2.83E-06 | 2.41E-06 | 1.64E-06 |
| InP | 3.35E-06 | 1.49E-06 | 3.81E-06 | 1.70E-06 | 1.03E-06 | 4.61E-07 |
| DBA | 3.83E-05 | 2.93E-05 | 1.60E-05 | 1.22E-05 | 1.45E-05 | 1.11E-05 |
| C1-CHR | 5.81E-05 | 1.85E-05 | 1.66E-05 | 5.27E-06 | 1.64E-05 | 5.21E-06 |
| 7M-BaP | 2.22E-06 | 1.51E-06 | 9.46E-07 | 6.47E-07 | 6.33E-07 | 4.32E-07 |
| DBF | 3.27E-07 | 1.46E-07 | 8.09E-08 | 3.61E-08 | 2.00E-08 | 8.93E-09 |
| C1-DBF | 2.94E-07 | 1.31E-07 | 8.94E-08 | 3.99E-08 | 9.23E-08 | 4.12E-08 |
| C2-DBF | 2.64E-08 | 1.18E-08 | 1.35E-08 | 6.02E-09 | 8.77E-09 | 3.91E-09 |
| Total Risk | 1.82E-04 | 8.41E-05 | 9.15E-05 | 4.29E-05 | 4.48E-05 | 2.31E-05 |
| Source Proportion(%) | 57.12% | 56.02% | 28.79% | 28.62% | 14.09% | 15.36% |


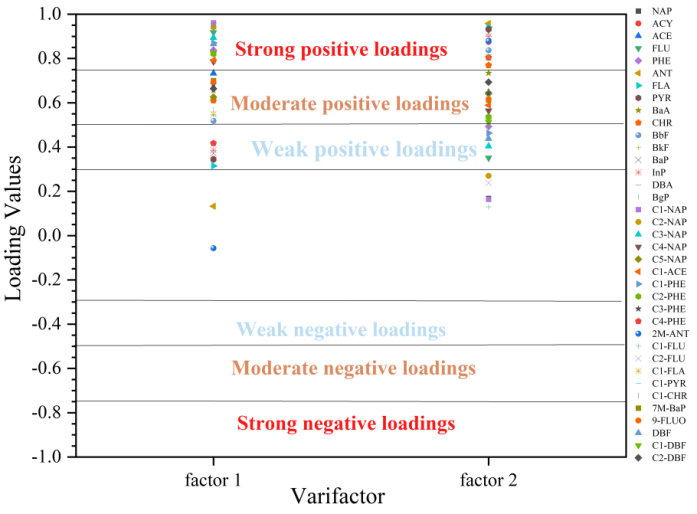


Fig. S1 Component loadings for parameters after varimax rotation.
